# Supplementary figures and images for: Functional features of the exopolysaccharide extracts produced by Lactiplantibacillus strains isolated from table olives
Source: Royal Society of Chemistry journal article supplement (doi:10.1039/d3fo04223e), 2024-01-01

### Gel 1

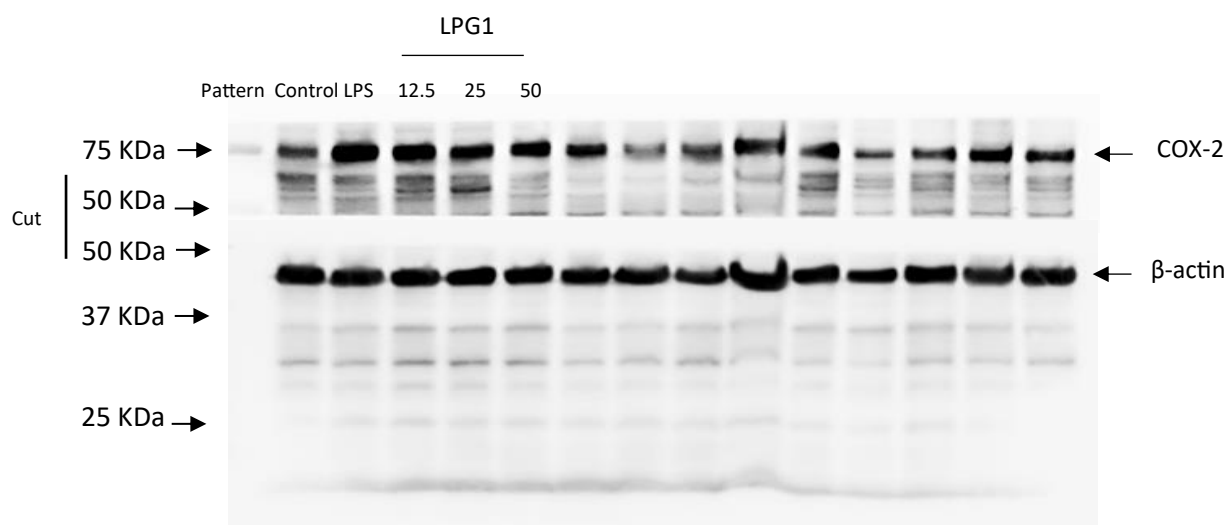

### Gel 2

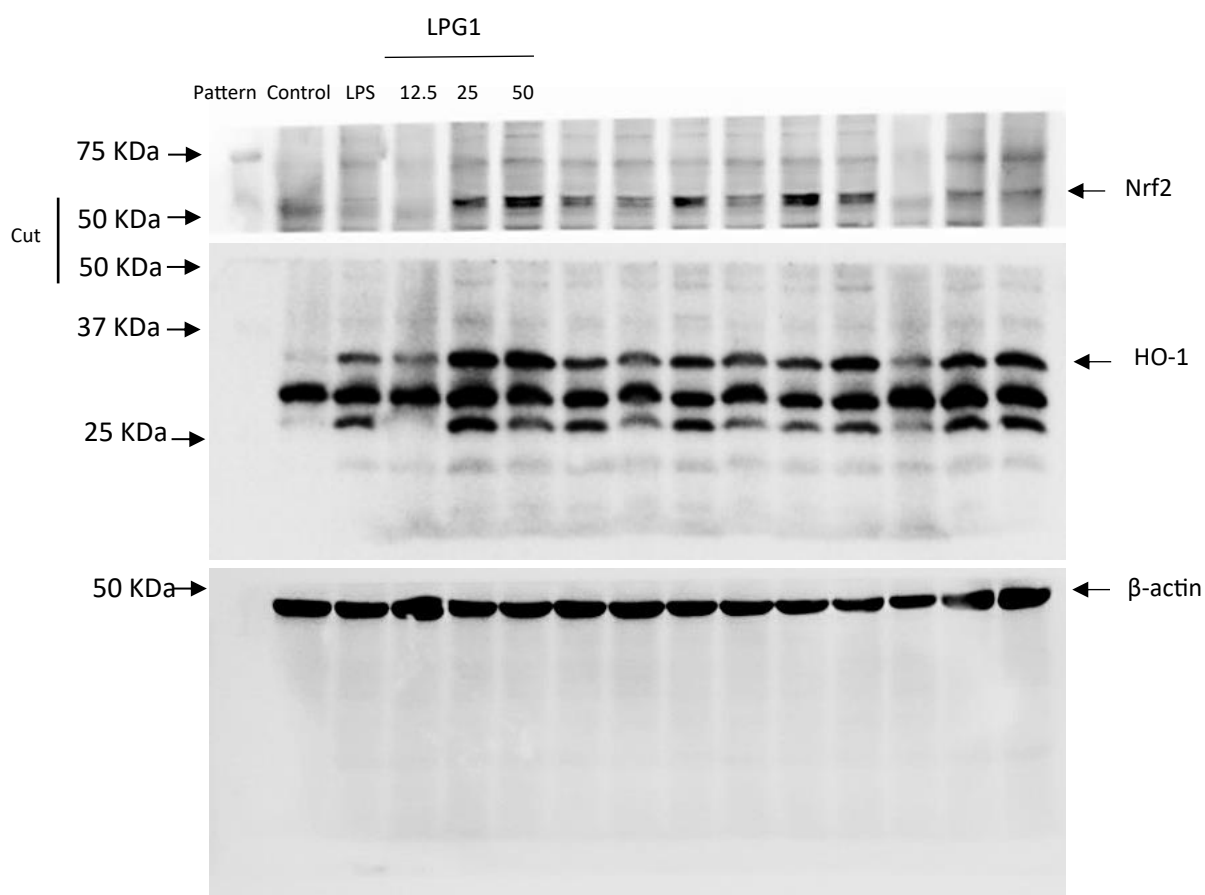

Supplement: d3fo04223e1.pdf [file d3fo04223e1.pdf]
